# Supplementary material for: Immune Cell Infiltrates and Neutrophil-to-Lymphocyte Ratio in Relation to Response to Chemotherapy and Prognosis in Laryngeal and Hypopharyngeal Squamous Cell Carcinomas
Source: MDPI journal article supplement (doi:10.3390/cancers13092079), 2021-04-25
Supplement: s1 [file s1]

## SUPPLEMENTARY INFORMATION

**Supplementary Table S1.** Values of the hematological parameters in HNSCC patients prior to induction chemotherapy (ICT) treatment.

|                | <b>Hemoglobin</b> | <b>Leucocytes</b>             | <b>Neutrophils</b>            | <b>Lymphocytes</b>            | <b>Platelets</b>              | <b>NLR</b> |
|----------------|-------------------|-------------------------------|-------------------------------|-------------------------------|-------------------------------|------------|
|                | <b>(gr/dl)</b>    | <b>(cells/mm<sup>3</sup>)</b> | <b>(cells/mm<sup>3</sup>)</b> | <b>(cells/mm<sup>3</sup>)</b> | <b>(cells/mm<sup>3</sup>)</b> |            |
| <b>Mean</b>    | 14.3              | 8845.57                       | 5847.21                       | 2079.67                       | 247183.33                     | 3.69       |
| <b>Median</b>  | 14.5              | 8400                          | 5450                          | 1920                          | 240500                        | 2.64       |
| <b>SD</b>      | 1.64              | 1875.87                       | 1946.26                       | 880.25                        | 66343.86                      | 2.98       |
| <b>Minimum</b> | 10.6              | 6000                          | 2880                          | 500                           | 147000                        | 0.58       |
| <b>Maximum</b> | 17.6              | 13250                         | 10700                         | 4970                          | 489000                        | 17.4       |

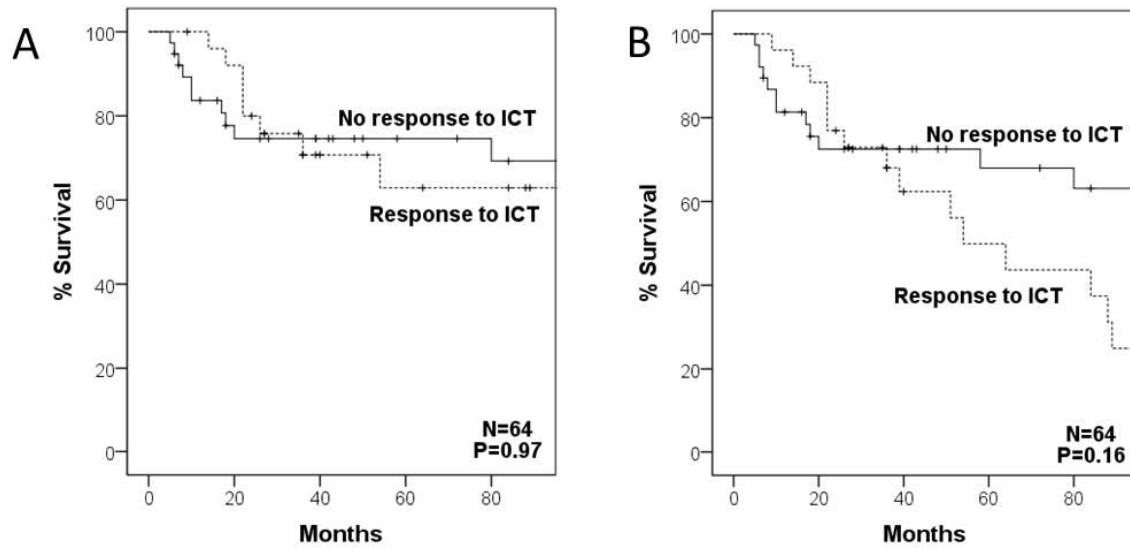

**Supplementary Figure S1.** Disease-specific (A) and overall (B) survival curves categorized according to the response to induction chemotherapy (ICT).

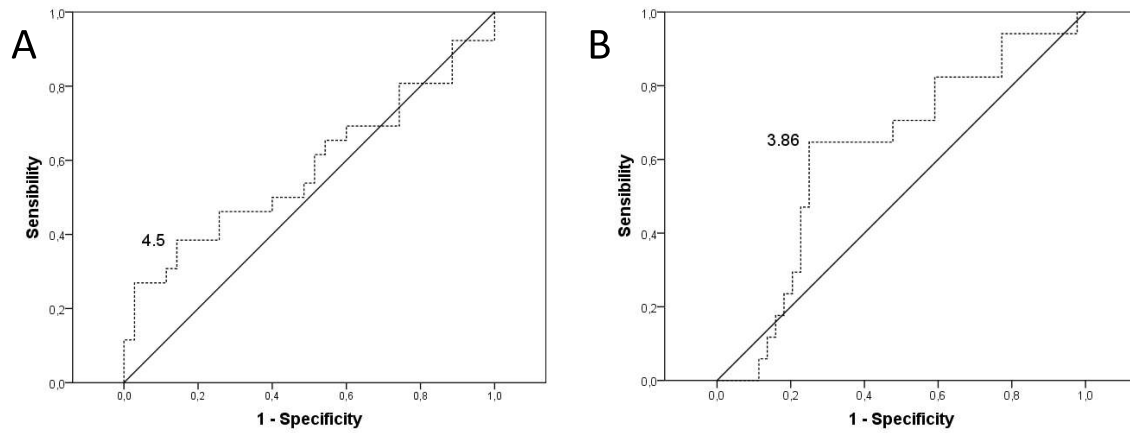

**Supplementary Figure S2.** ROC curves used to calculate the optimal cut-off values for the neutrophil-to-lymphocyte ratio (NLR) in relation to the response to induction chemotherapy (A), and patient survival (B). The optimal values calculated are shown.

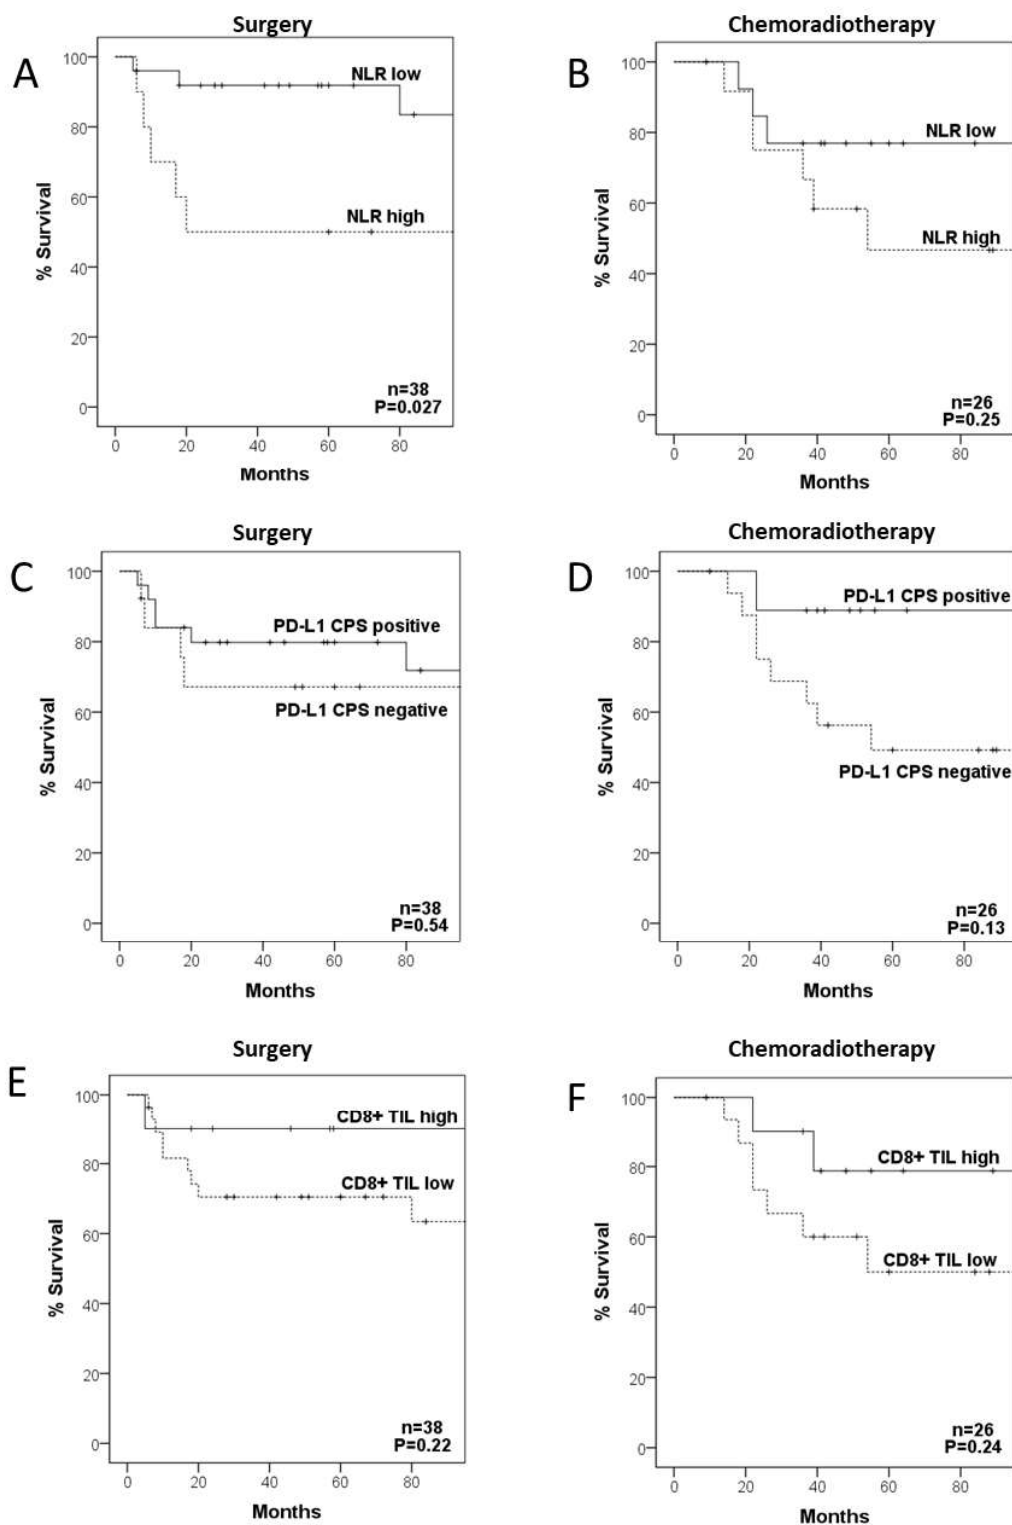

**Supplementary Figure S3.** Disease-specific survival curves categorized according to neutrophil-to-lymphocyte ratio (NLR; A, B), PD-L1 composite proportion score (CPS; C, D), and CD8+ TIL density (E, F), in the subsets of patients treated with chemoradiotherapy or surgery.

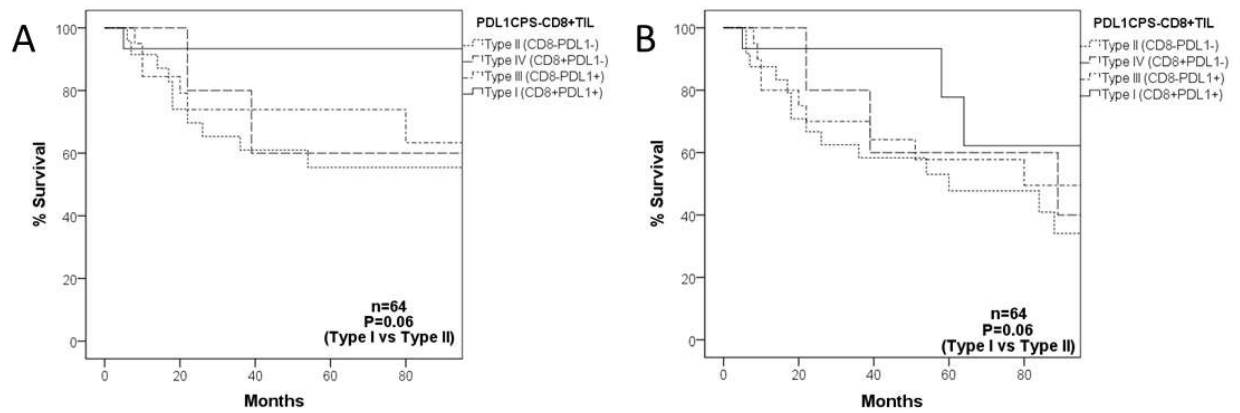

**Supplementary Figure S4.** Disease-specific (A) and overall survival curves categorized according to the type of immune tumor microenvironment.
